# Supplementary material
Source: ML conference proceedings conference paper supplement (https://openaccess.thecvf.com/content/CVPR2024/html/Deng_PrPSeg_Universal_Proposition_CVPR_2024_paper.html)

# Dynamic Token Bank

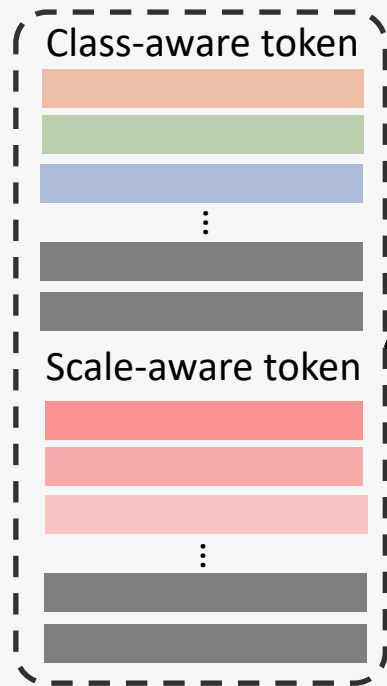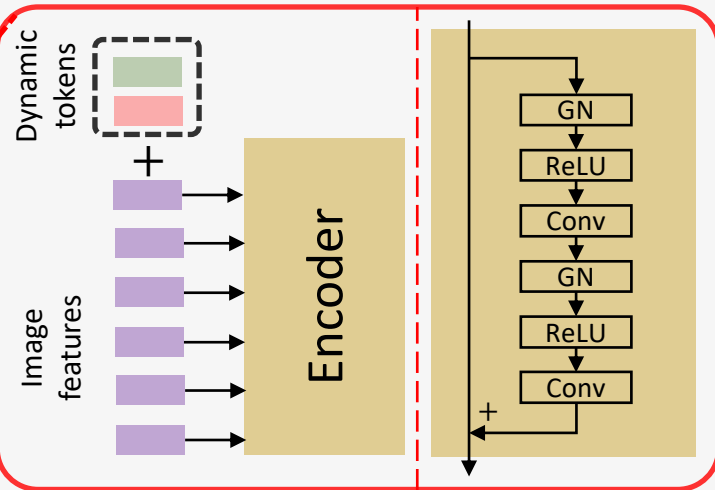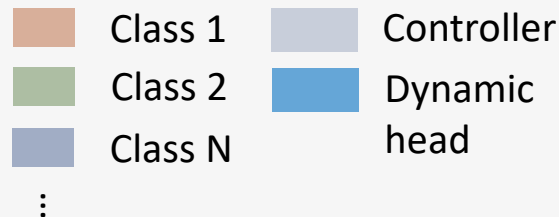

Token-based Dynamic Head Network

Backbone **is the same** when extend new classes

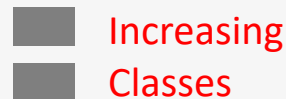

Supplement: Supplementary file 4 [file Deng_PrPSeg_Universal_Proposition_CVPR_2024_supplemental.zip]
