# Supplementary material
Source: ML conference proceedings conference paper supplement (https://openaccess.thecvf.com/content/CVPR2024/html/Deng_PrPSeg_Universal_Proposition_CVPR_2024_paper.html)
Supplement: Supplementary file 6 [file Deng_PrPSeg_Universal_Proposition_CVPR_2024_supplemental.zip]

|               |         | Segmentation Results in Different Tissues                                           |                                                                                     |                                                                                     |                                                                                      |                                                                                       |                                                                                       |                                                                                       |                                                                                       |                                                                                       |                                                                                       |                                                                                       |                                                                                       |
|---------------|---------|-------------------------------------------------------------------------------------|-------------------------------------------------------------------------------------|-------------------------------------------------------------------------------------|--------------------------------------------------------------------------------------|---------------------------------------------------------------------------------------|---------------------------------------------------------------------------------------|---------------------------------------------------------------------------------------|---------------------------------------------------------------------------------------|---------------------------------------------------------------------------------------|---------------------------------------------------------------------------------------|---------------------------------------------------------------------------------------|---------------------------------------------------------------------------------------|
|               |         | Image                                                                               | Label                                                                               | U-Net                                                                               | DeepLabv3                                                                            | Residual-U.                                                                           | Multi-Kidney                                                                          | Omni-Seg                                                                              | Segmenter                                                                             | SegFormer                                                                             | Unetr                                                                                 | Swin-Unetr                                                                            | PrPSeg*                                                                               |
| Tissue Object | Medulla | 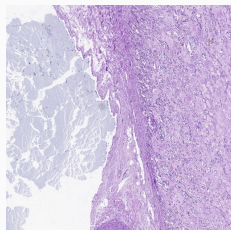   |    |    |    |    |    |    |    |    |    |    |    |
|               | Cortex  |    |    |    |    |    |    |    |    |    |    |    |    |
|               | DT      |    |    |    |    |    |    |    |    |    |    |    |    |
|               | PT      |   |   |   |   |   |   |   |   |   |   |   |   |
|               | CAP     |  |  |  |  |  |  |  |  |  |  |  |  |
|               | TUFT    |  |  |  |  |  |  |  |  |  |  |  |  |
|               | Pod     |  |  |  |  |  |  |  |  |  |  |  |  |
|               | Mes     |  |  |  |  |  |  |  |  |  |  |  |  |
