# Supplementary material
Source: ML conference proceedings conference paper supplement (https://openaccess.thecvf.com/content/CVPR2024/html/Deng_PrPSeg_Universal_Proposition_CVPR_2024_paper.html)
Supplement: Supplementary file 7 [file Deng_PrPSeg_Universal_Proposition_CVPR_2024_supplemental.zip]

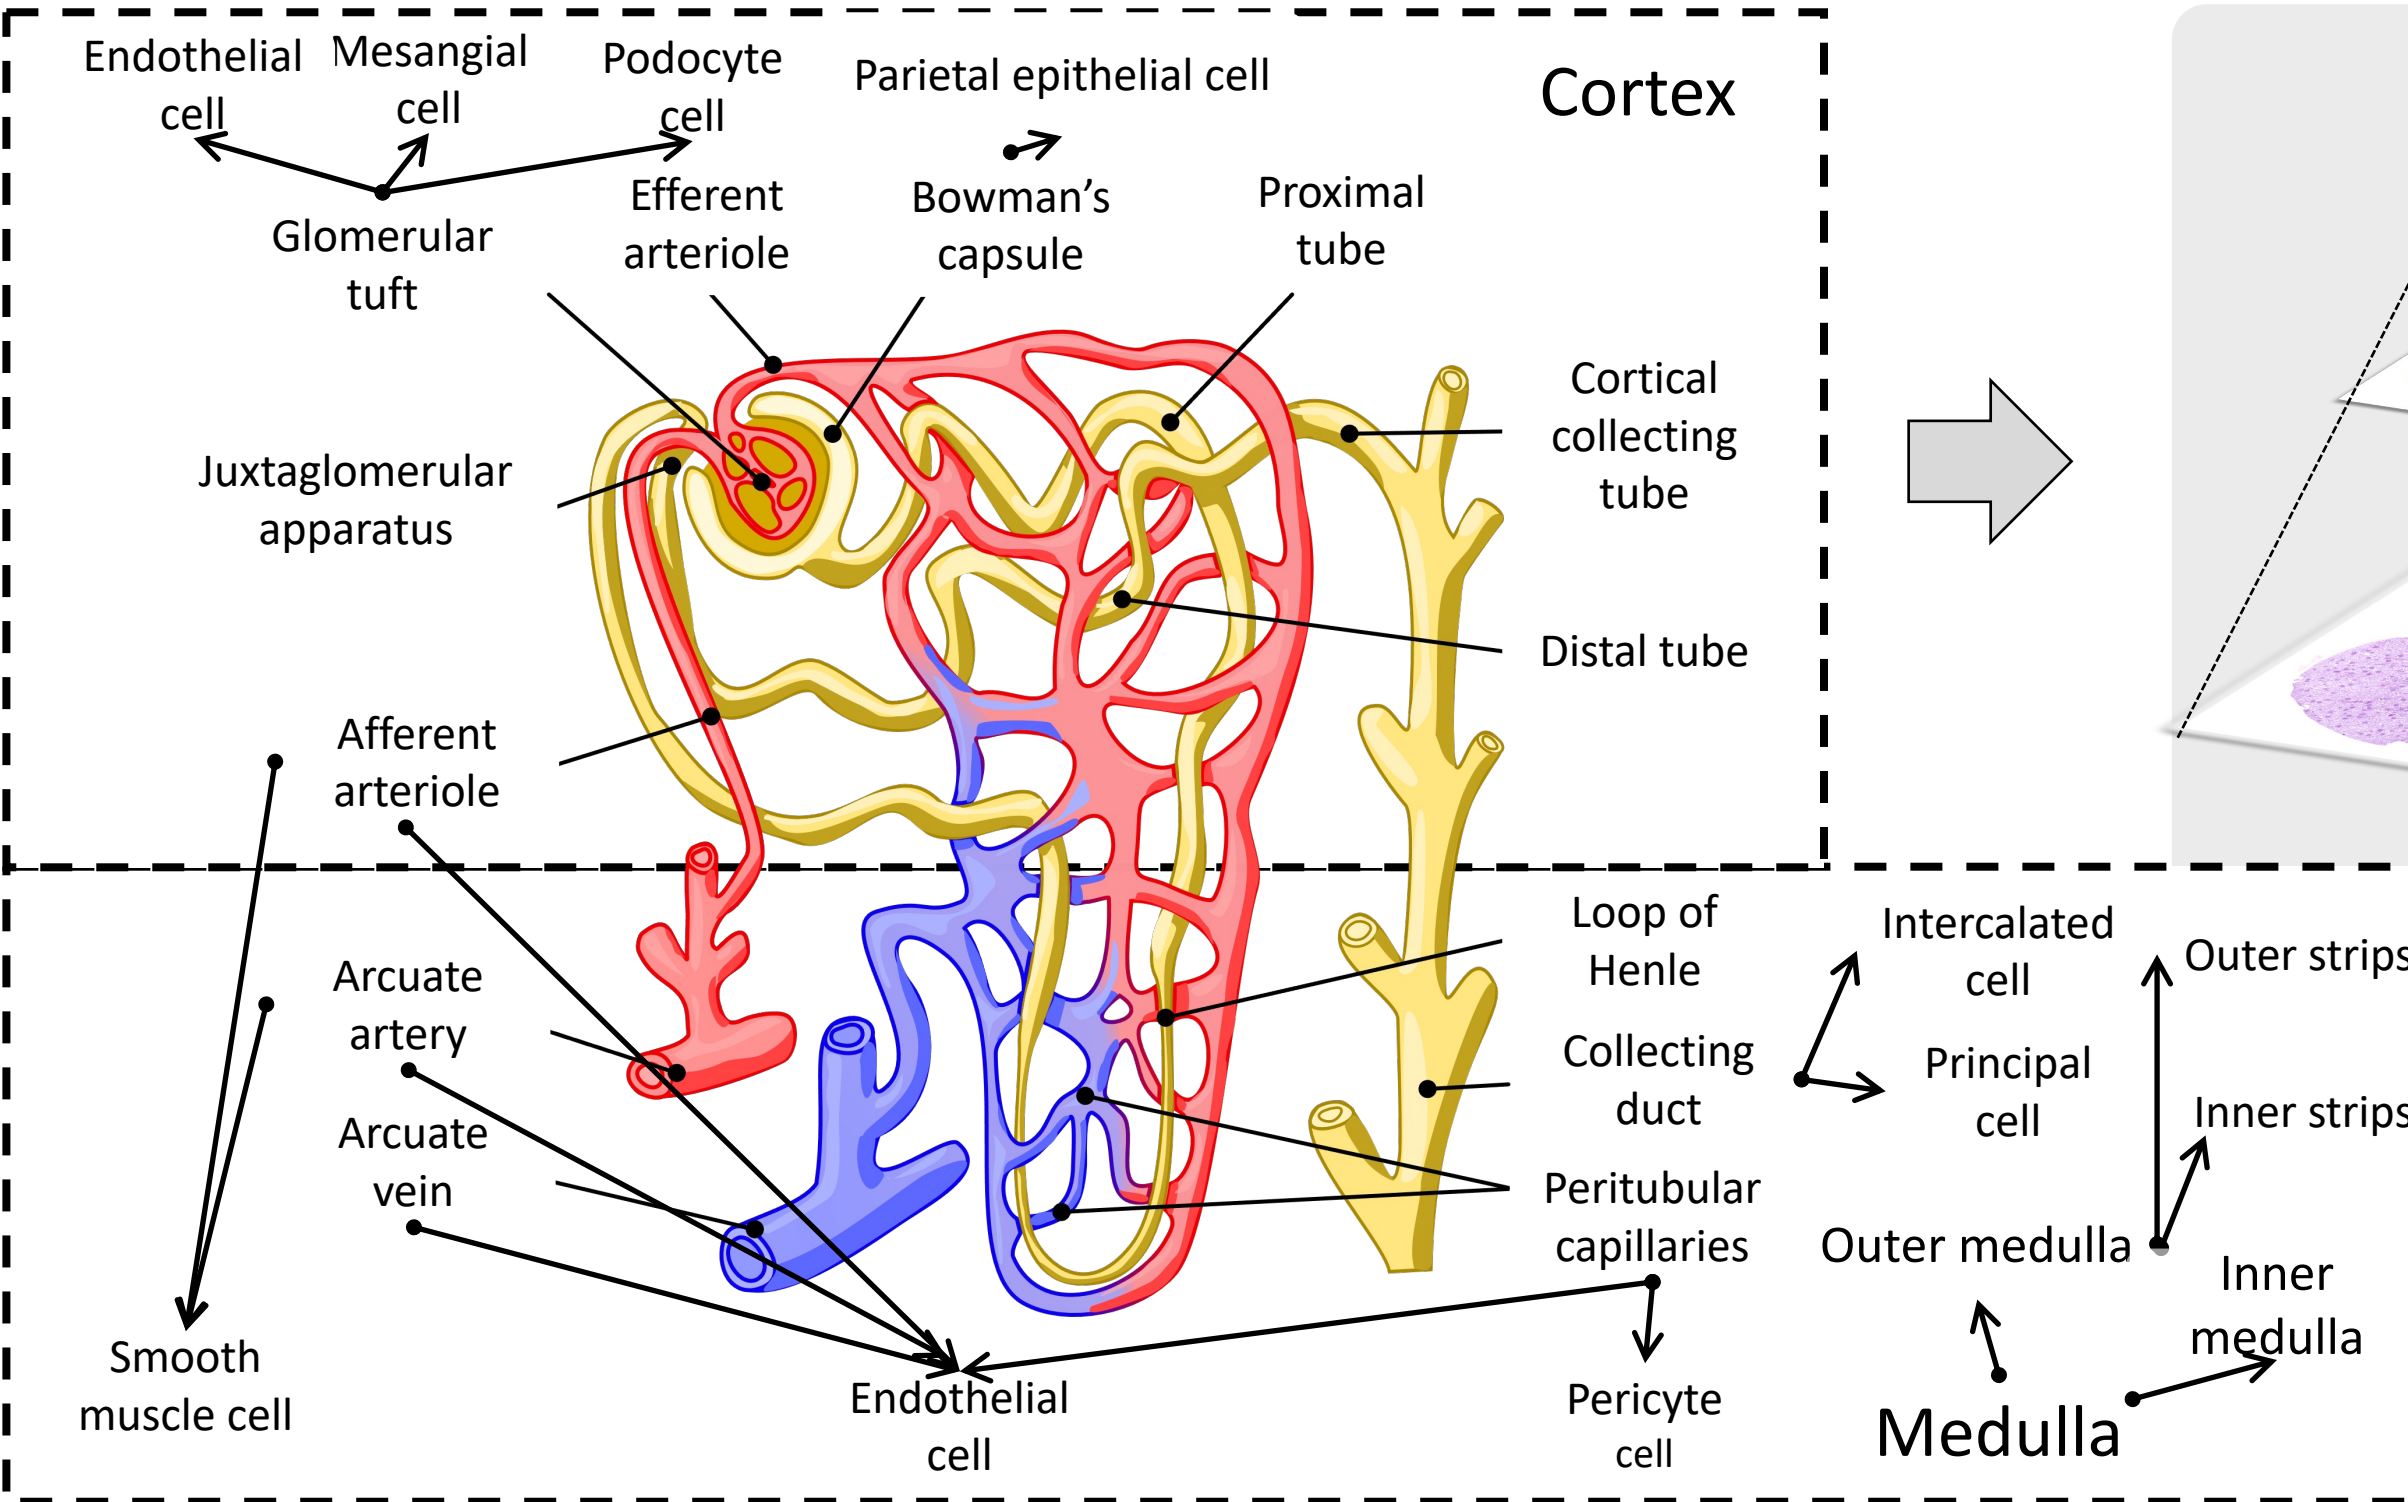

a. Clinical Anatomy of Kidney Functional Units

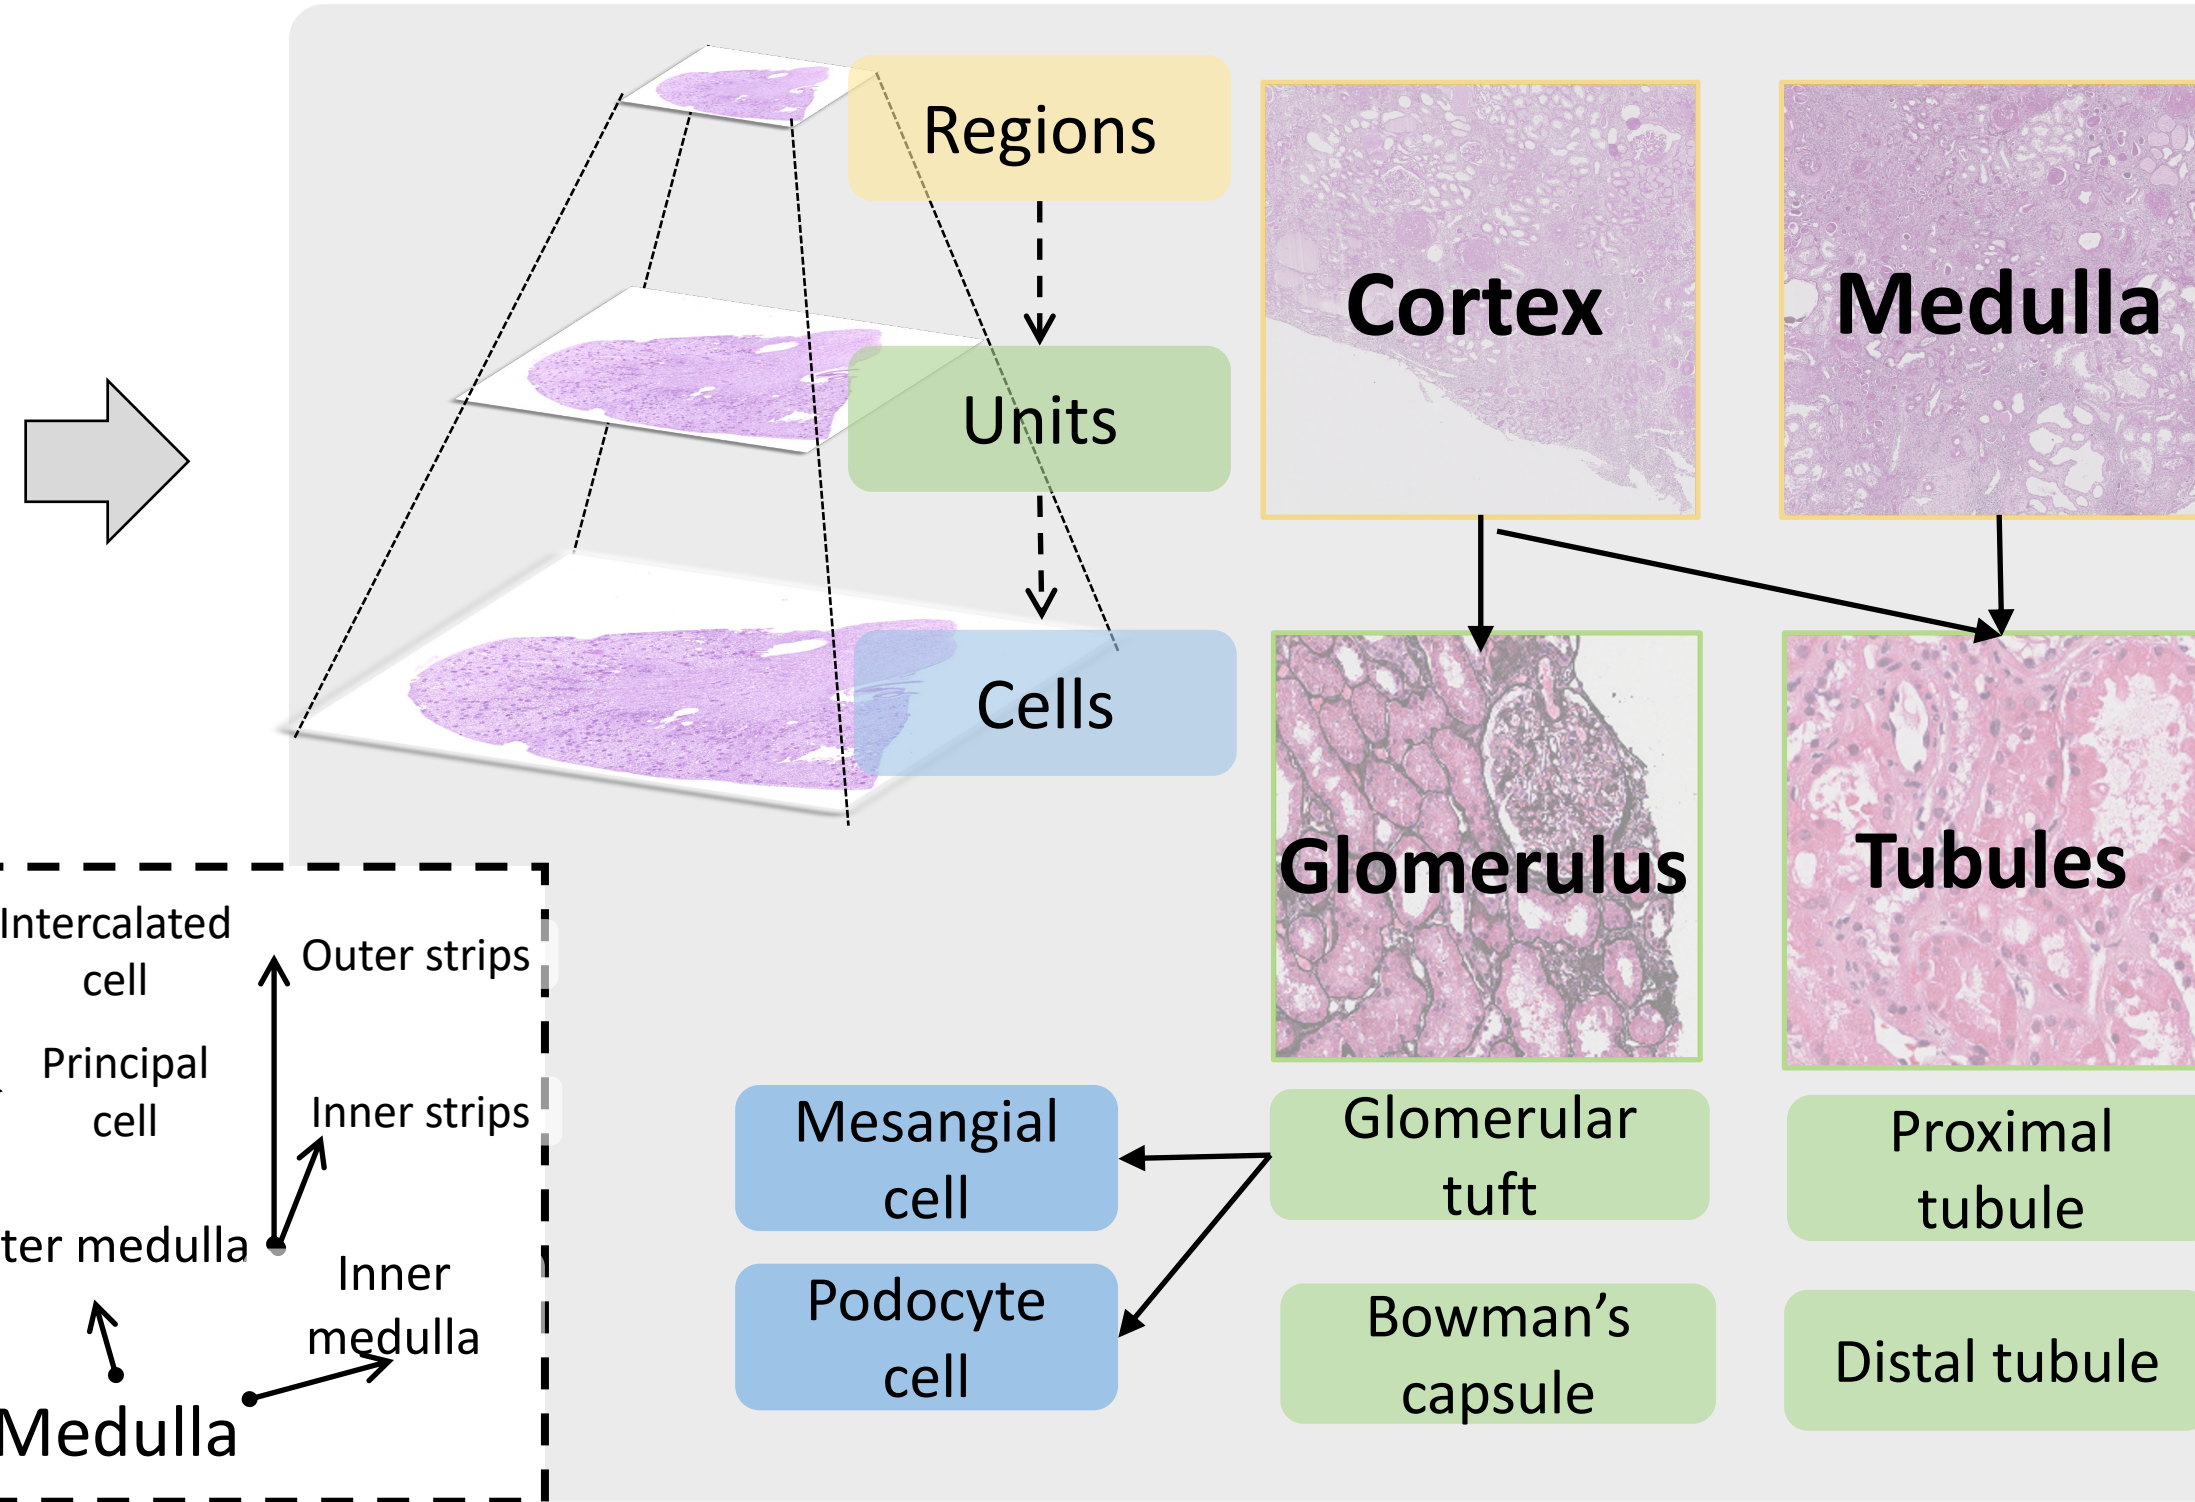

b. Hierarchical Semantic Taxonomy

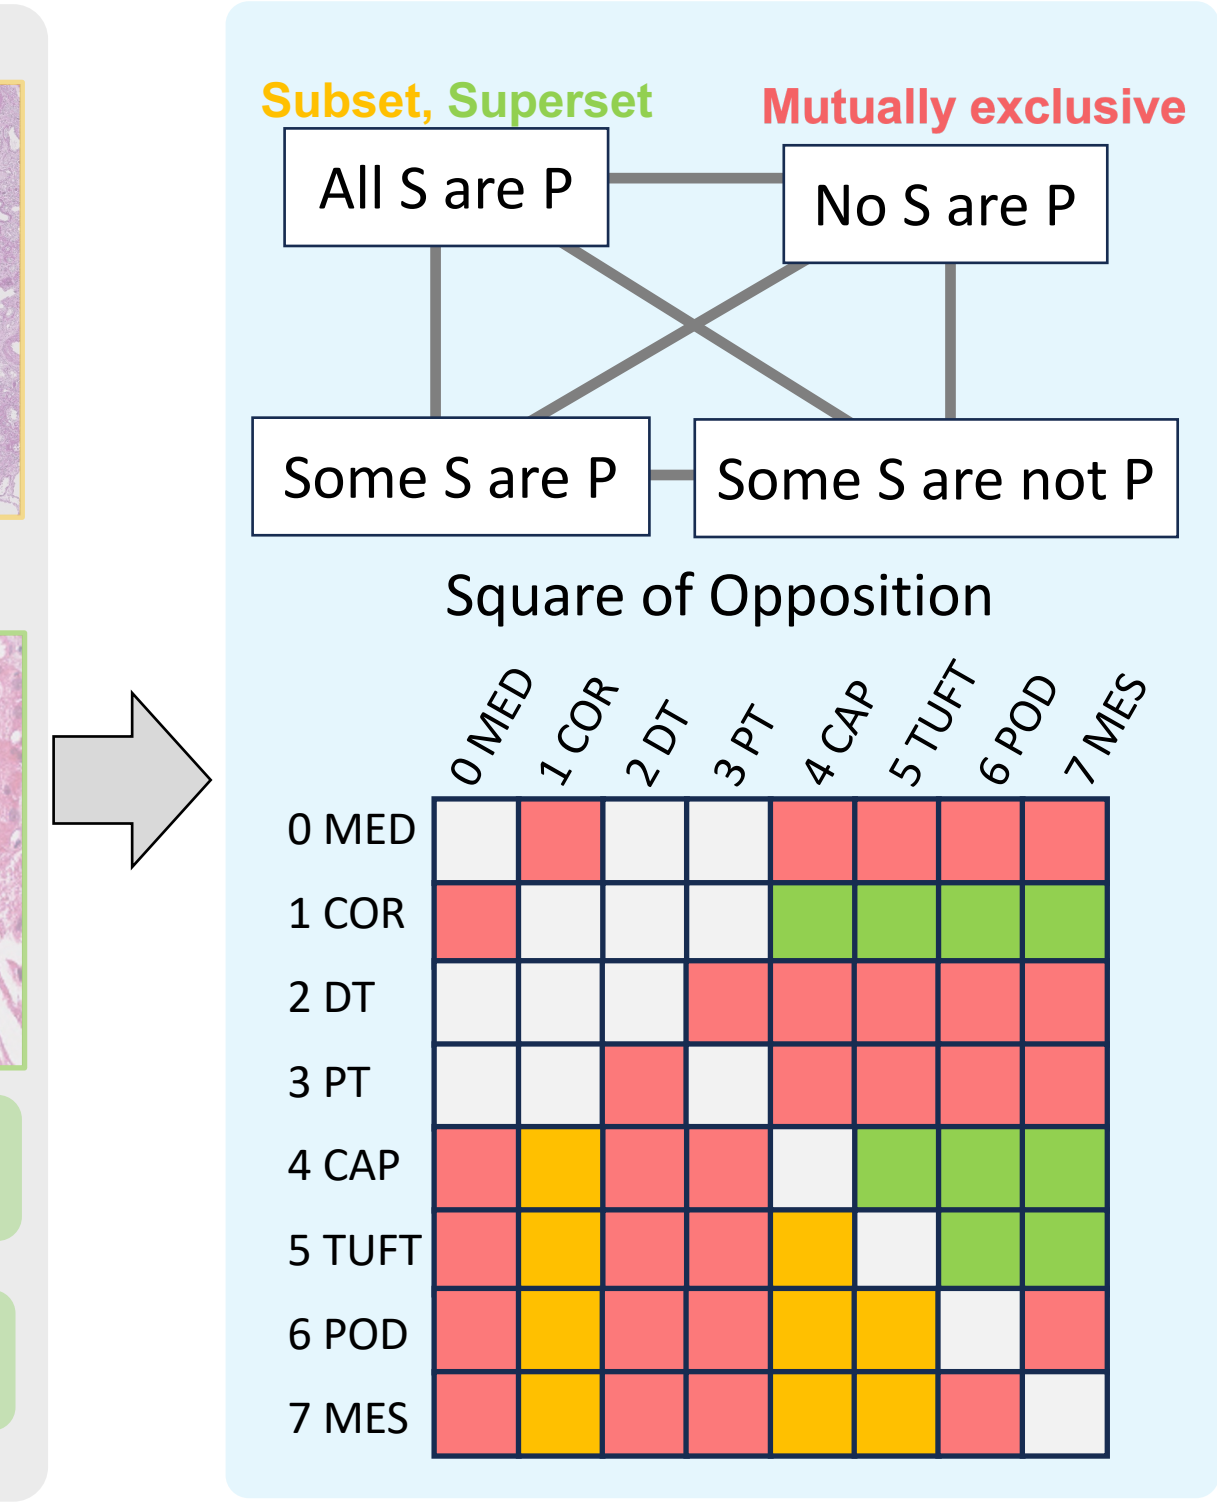

c. Universal Proposition Matrix
