# Supplementary material
Source: ML conference proceedings conference paper supplement (https://openaccess.thecvf.com/content/CVPR2024/html/Deng_PrPSeg_Universal_Proposition_CVPR_2024_paper.html)
Supplement: Supplementary file 9 [file Deng_PrPSeg_Universal_Proposition_CVPR_2024_supplemental.zip]

a. Extensible Anatomical Relationship

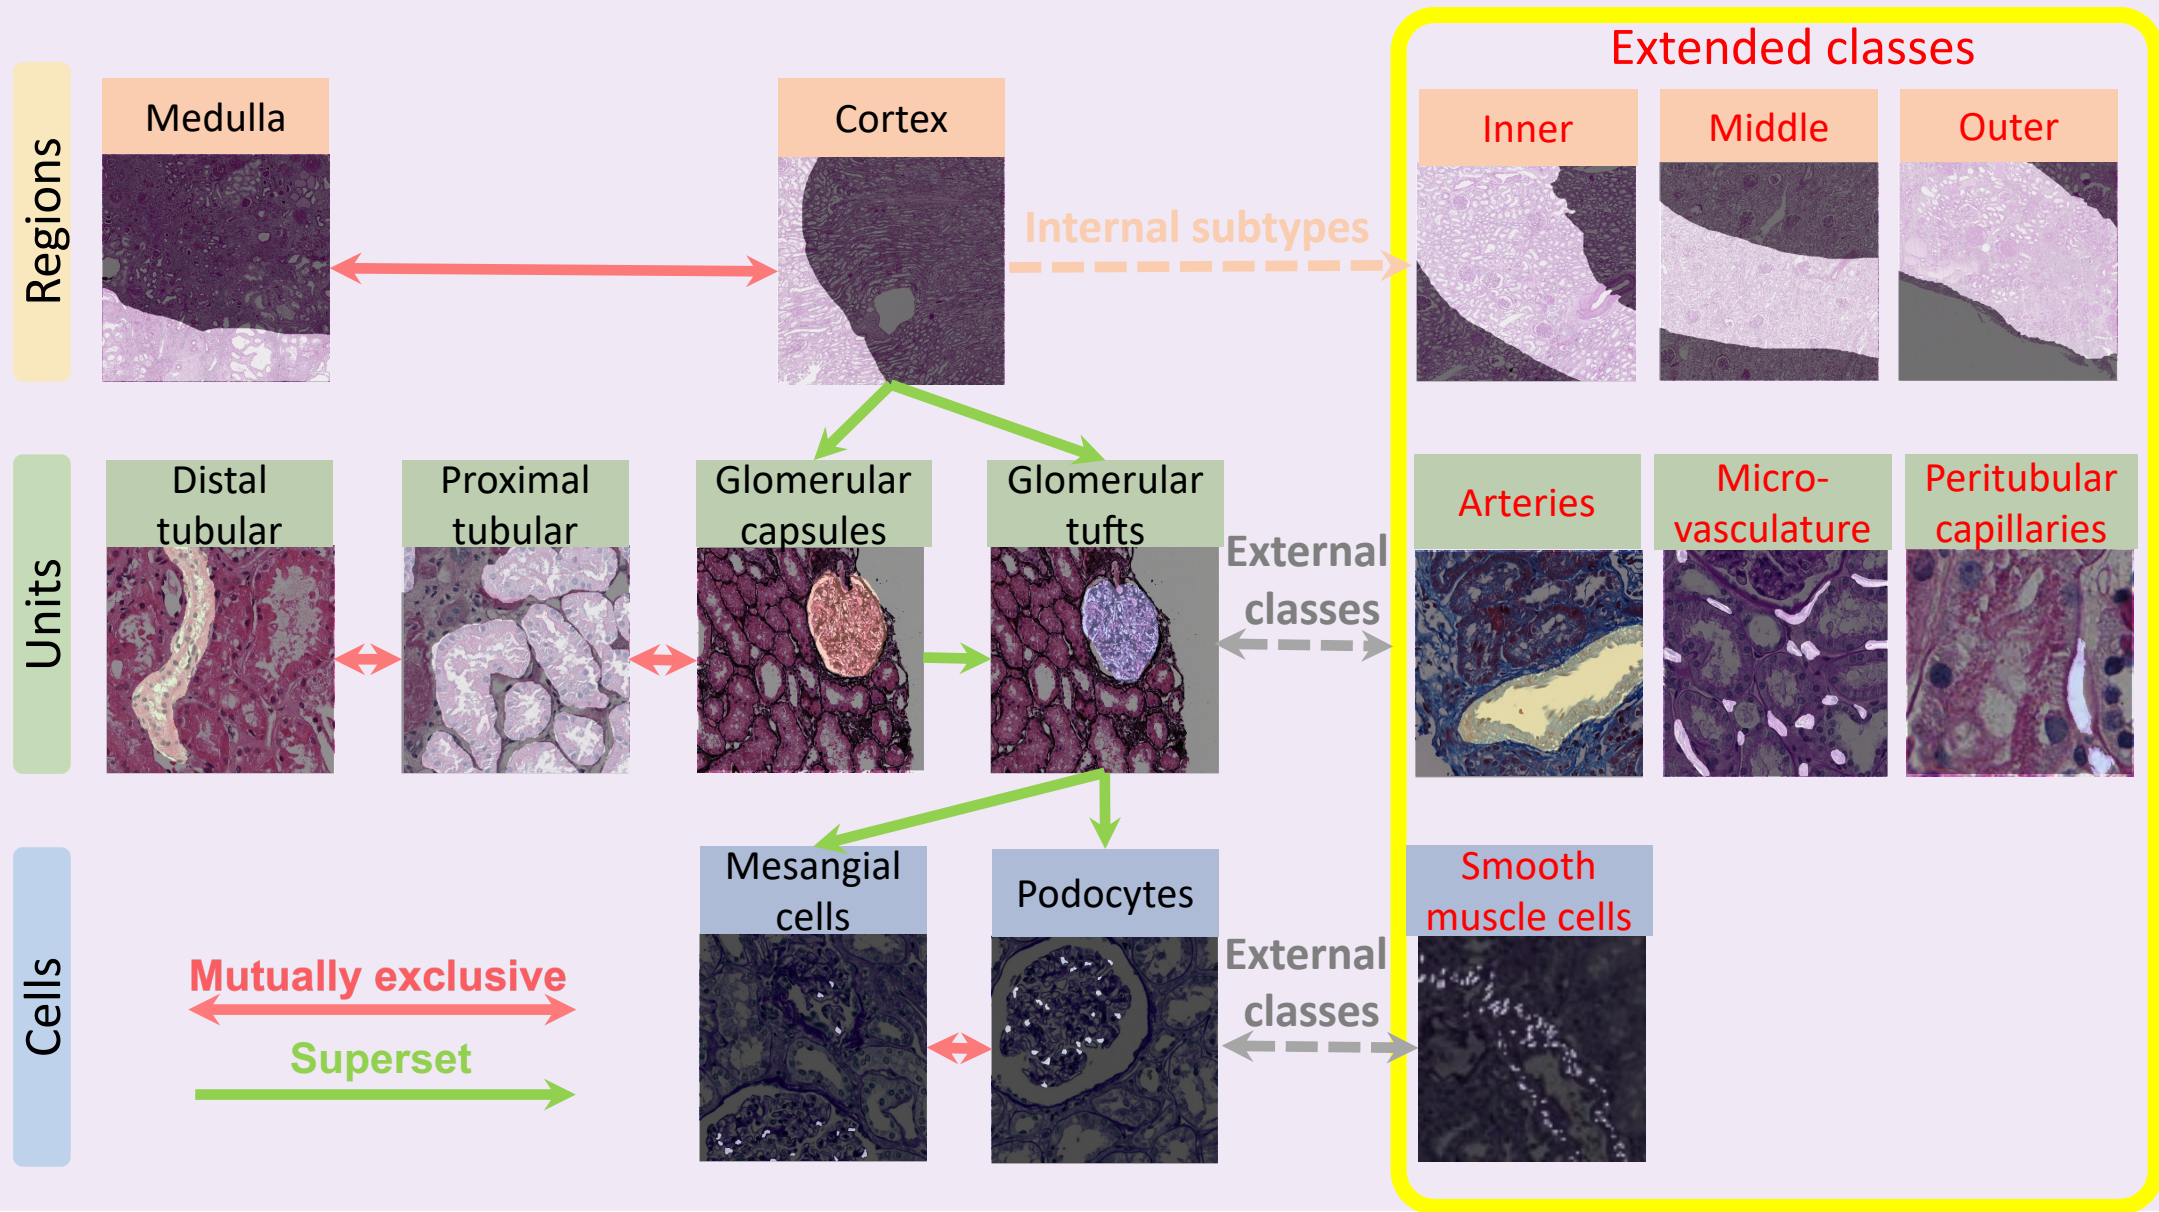

b. Adaptable Proposition Matrix

Universal proposition matrix

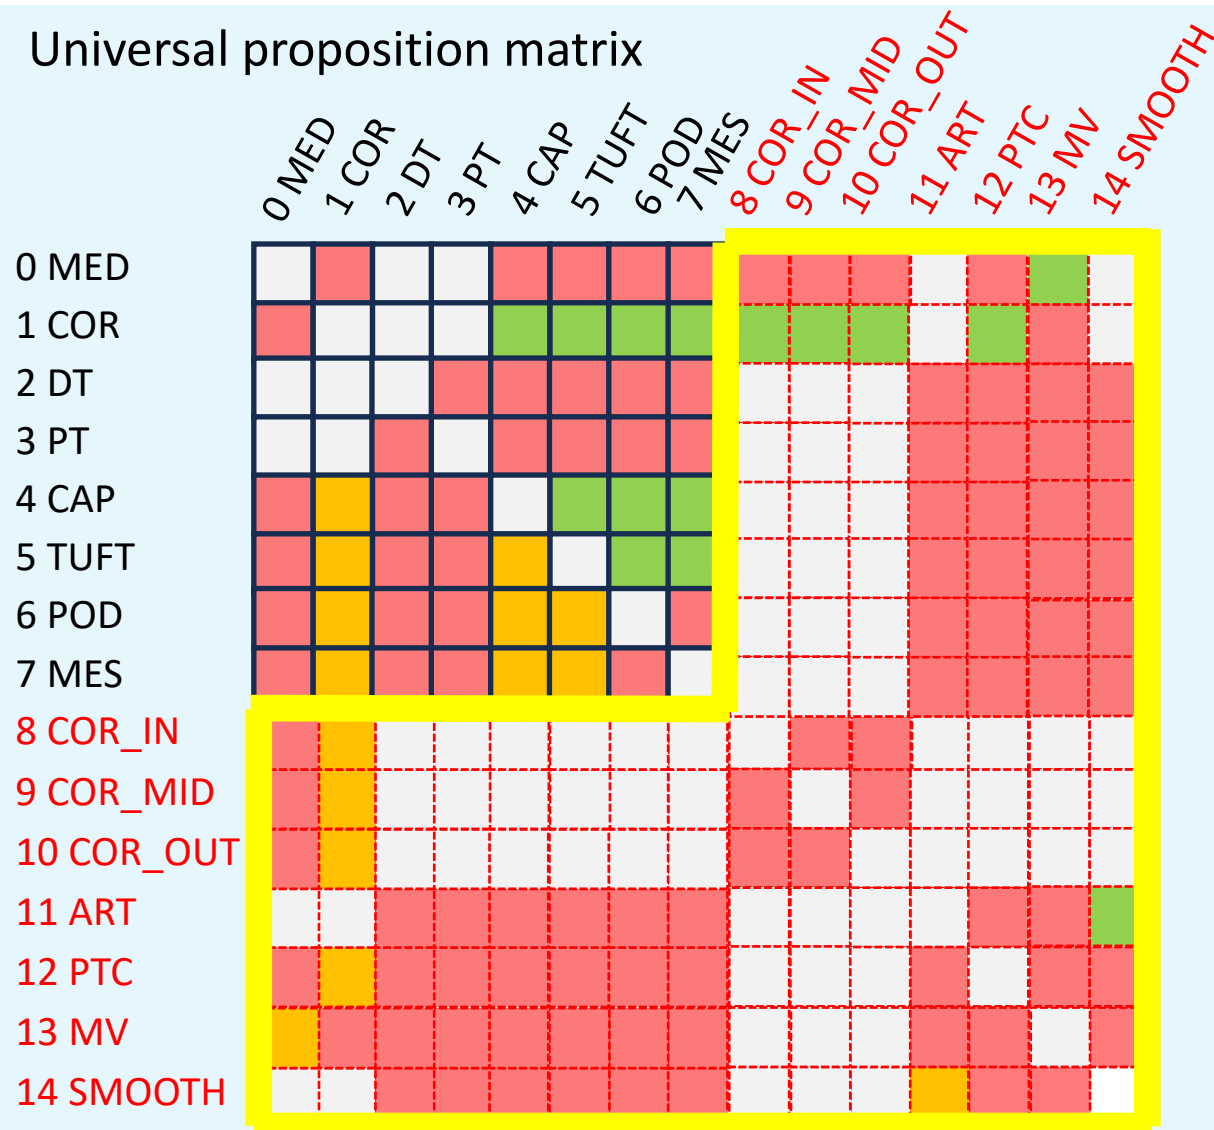

Class-aware token

Original classes

|         |      |
|---------|------|
| Class 0 | MED  |
| Class 1 | COR  |
| Class 2 | DT   |
| Class 3 | PT   |
| Class 4 | CAP  |
| Class 5 | TUFT |
| Class 6 | POD  |
| Class 7 | MES  |

Extended classes

|          |         |
|----------|---------|
| Class 8  | COR_IN  |
| Class 9  | COR_MID |
| Class 10 | COR_OUT |
| Class 11 | ART     |
| Class 12 | PTC     |
| Class 13 | MV      |
| Class 14 | SMOOTH  |
