# Supplementary material
Source: ML conference proceedings conference paper supplement (https://openaccess.thecvf.com/content/CVPR2024/html/Deng_PrPSeg_Universal_Proposition_CVPR_2024_paper.html)

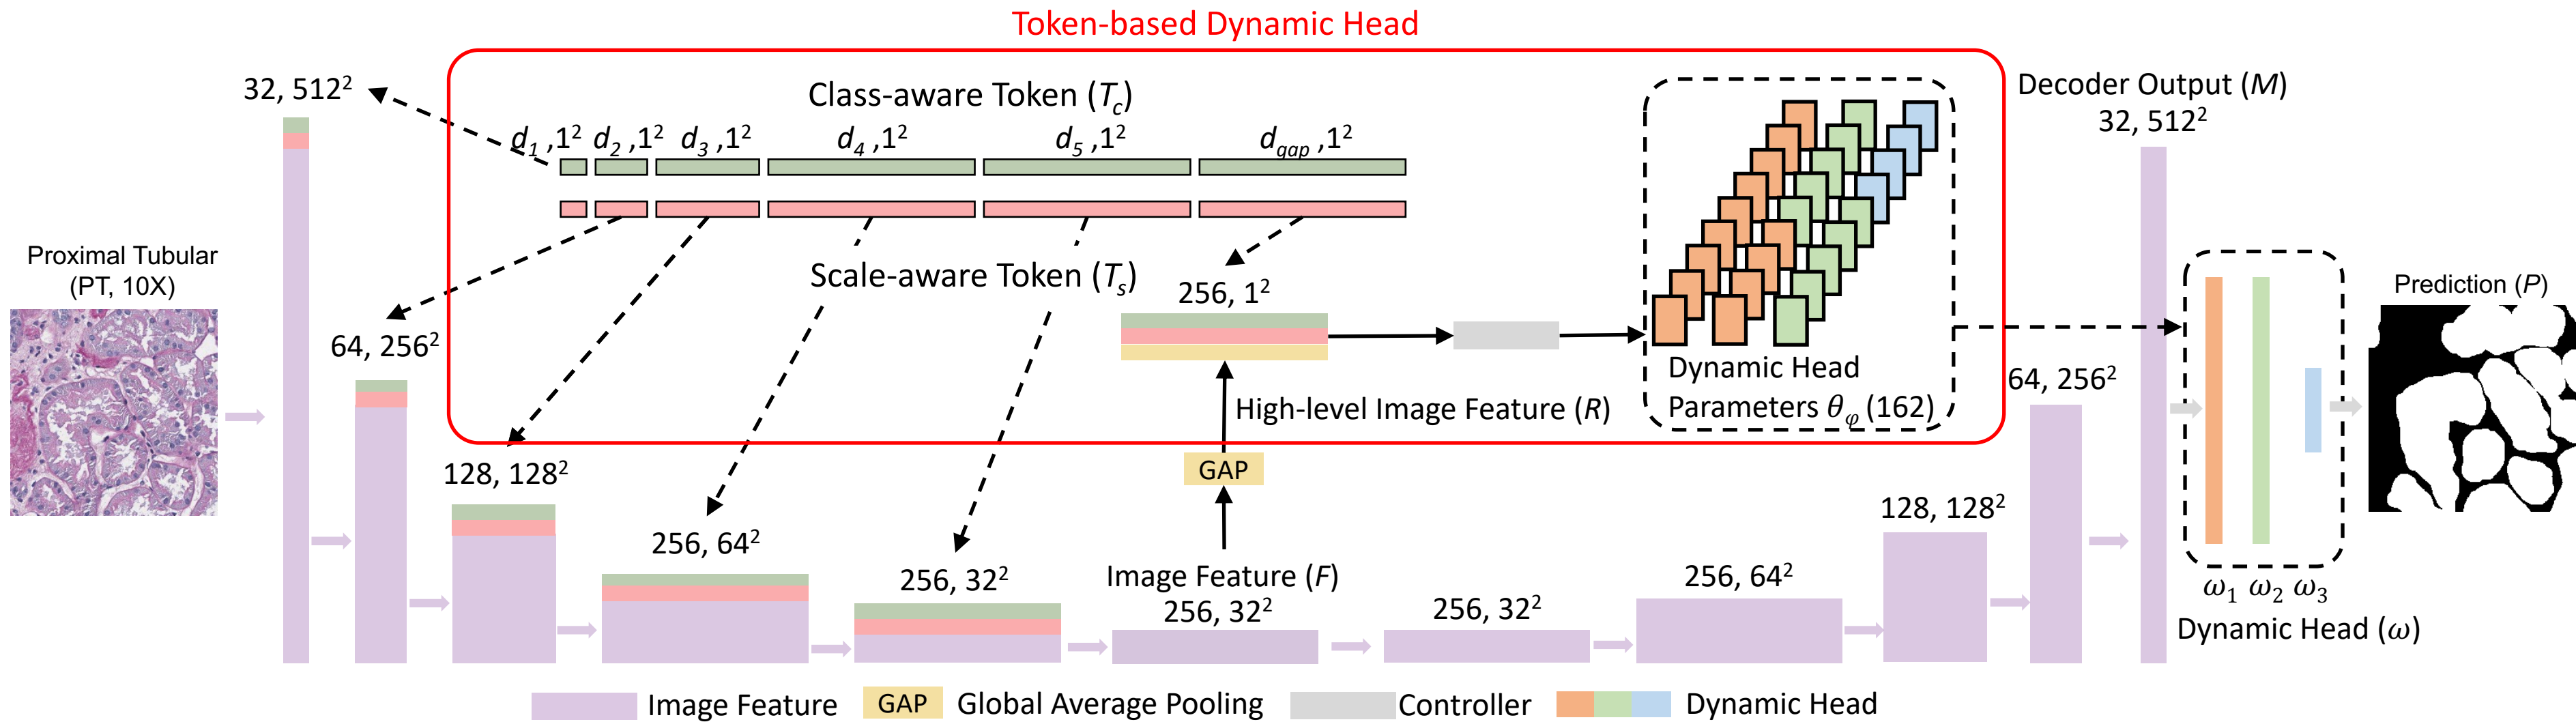

Supplement: Supplementary file 1 [file Deng_PrPSeg_Universal_Proposition_CVPR_2024_supplemental.zip]

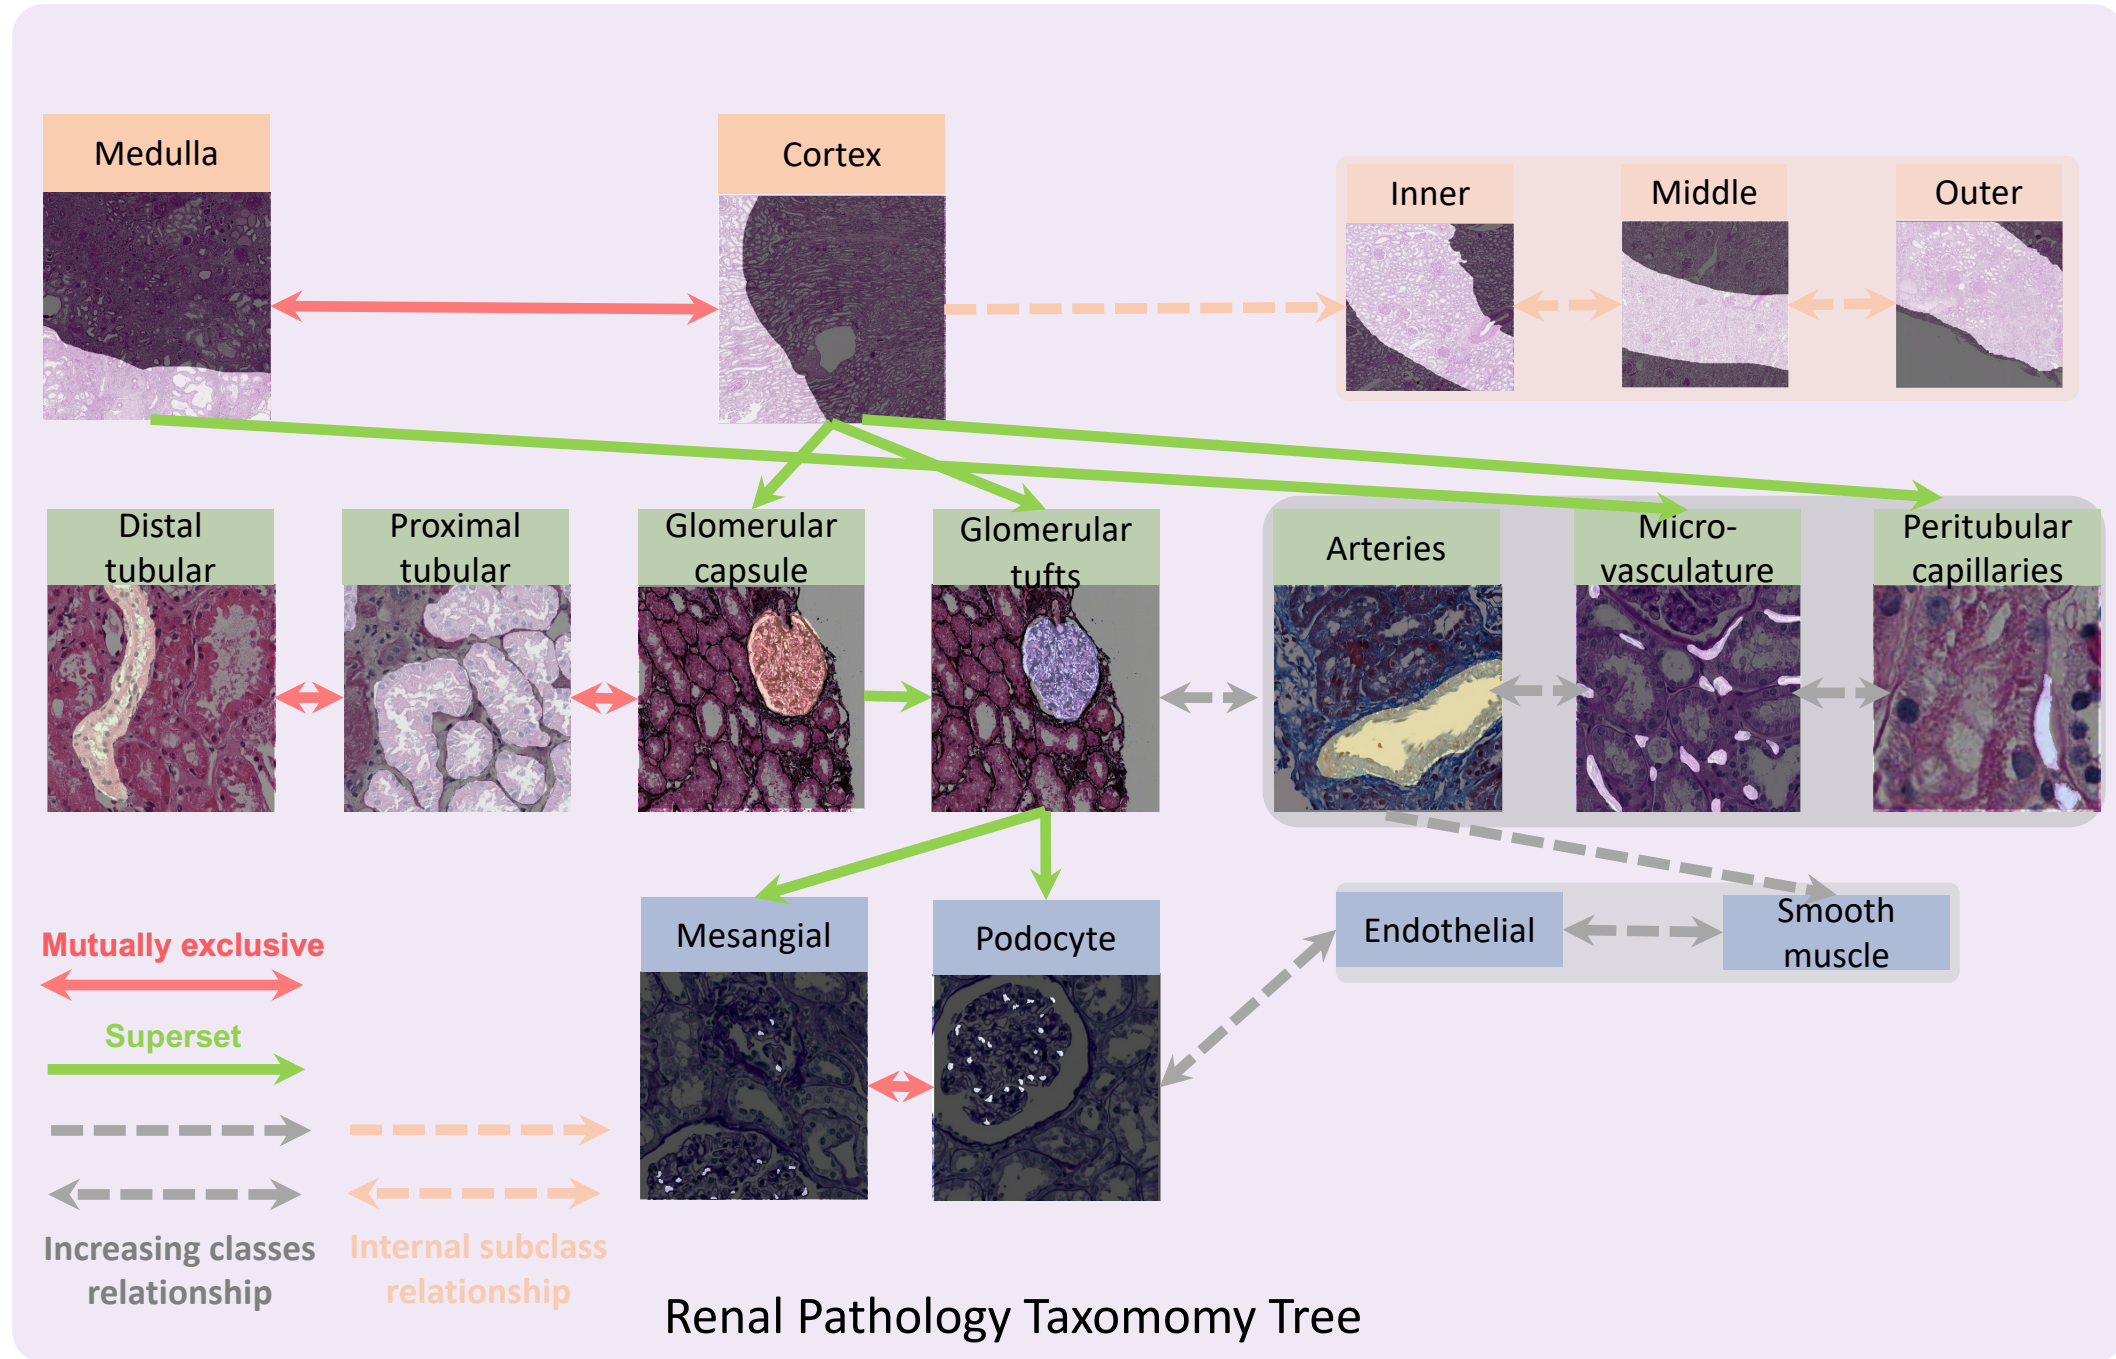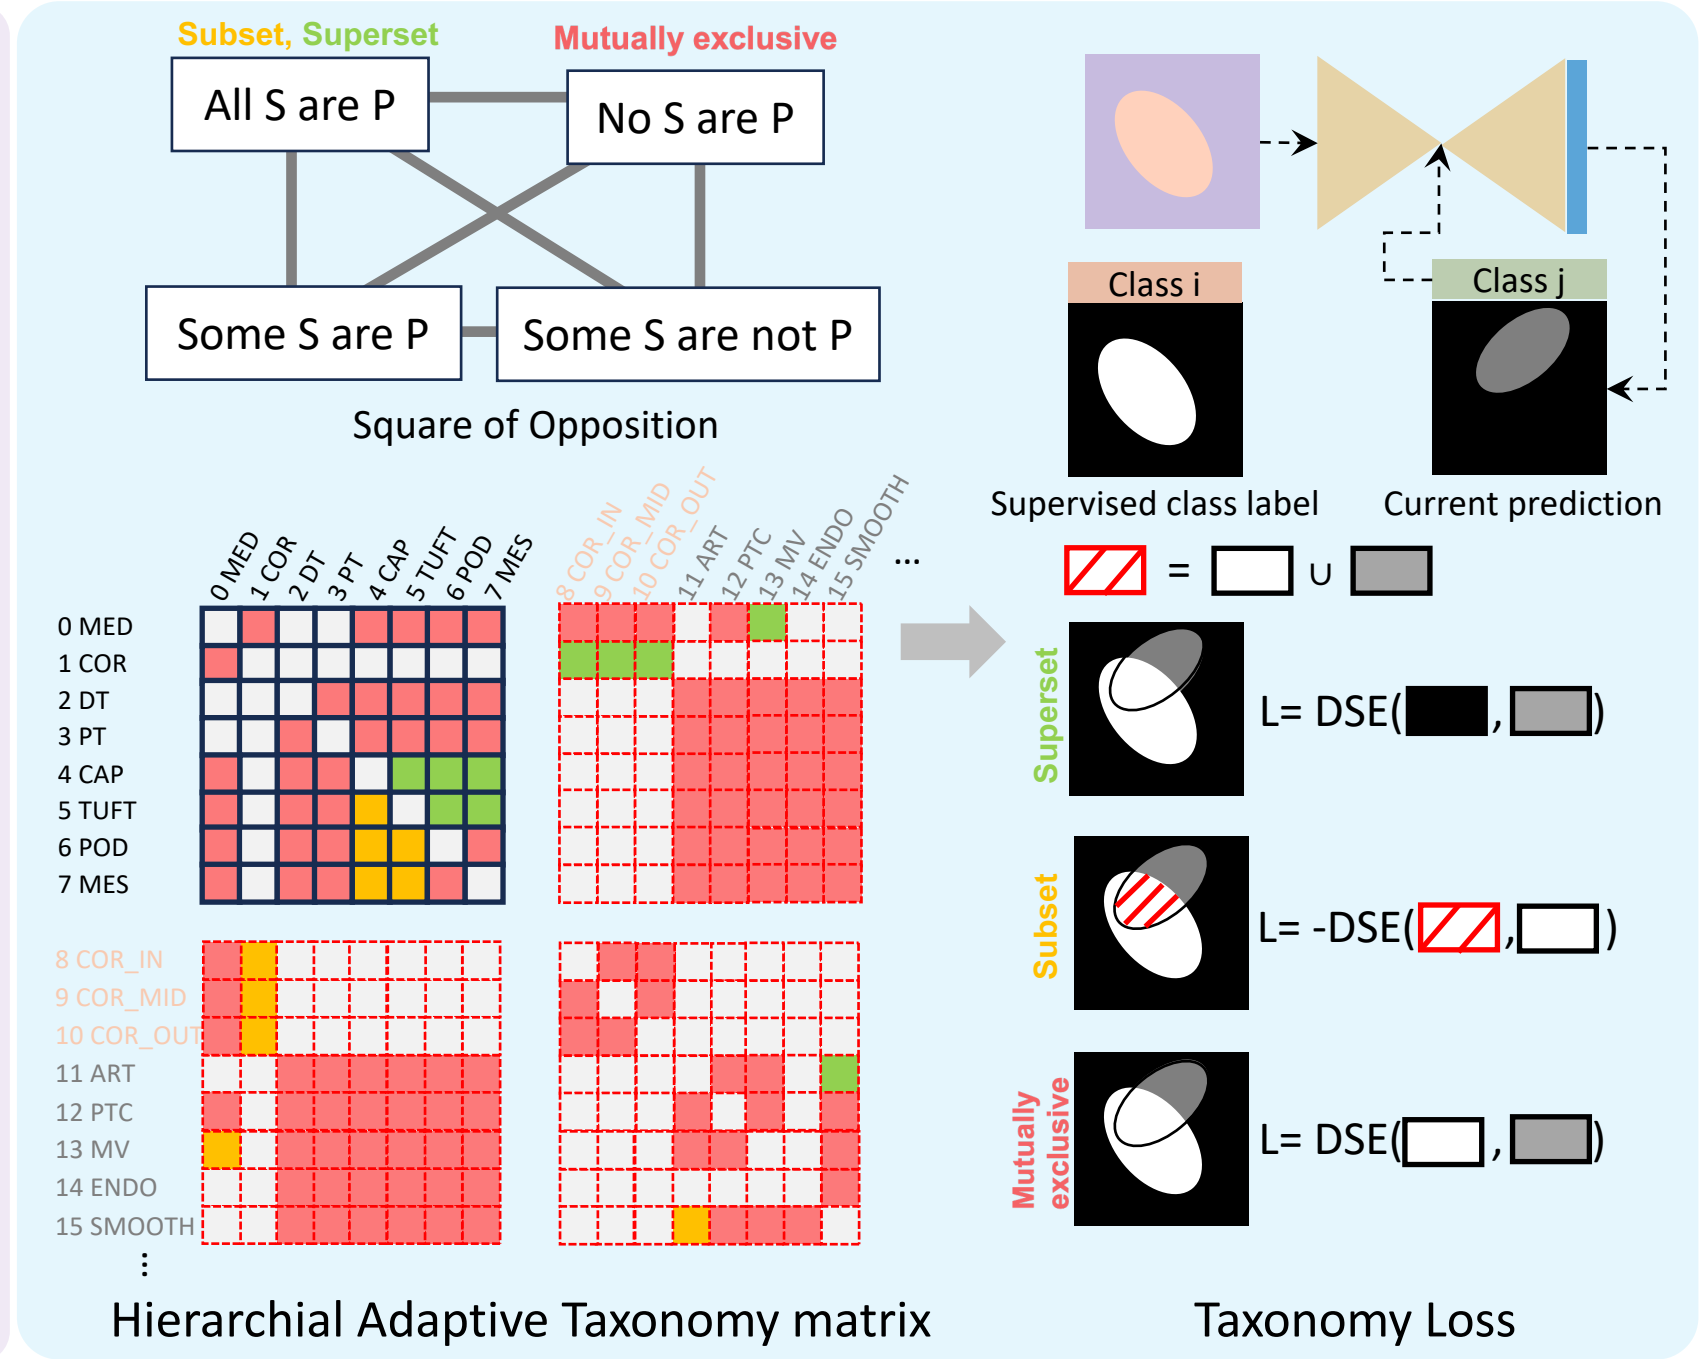

Supplement: Supplementary file 3 [file Deng_PrPSeg_Universal_Proposition_CVPR_2024_supplemental.zip]

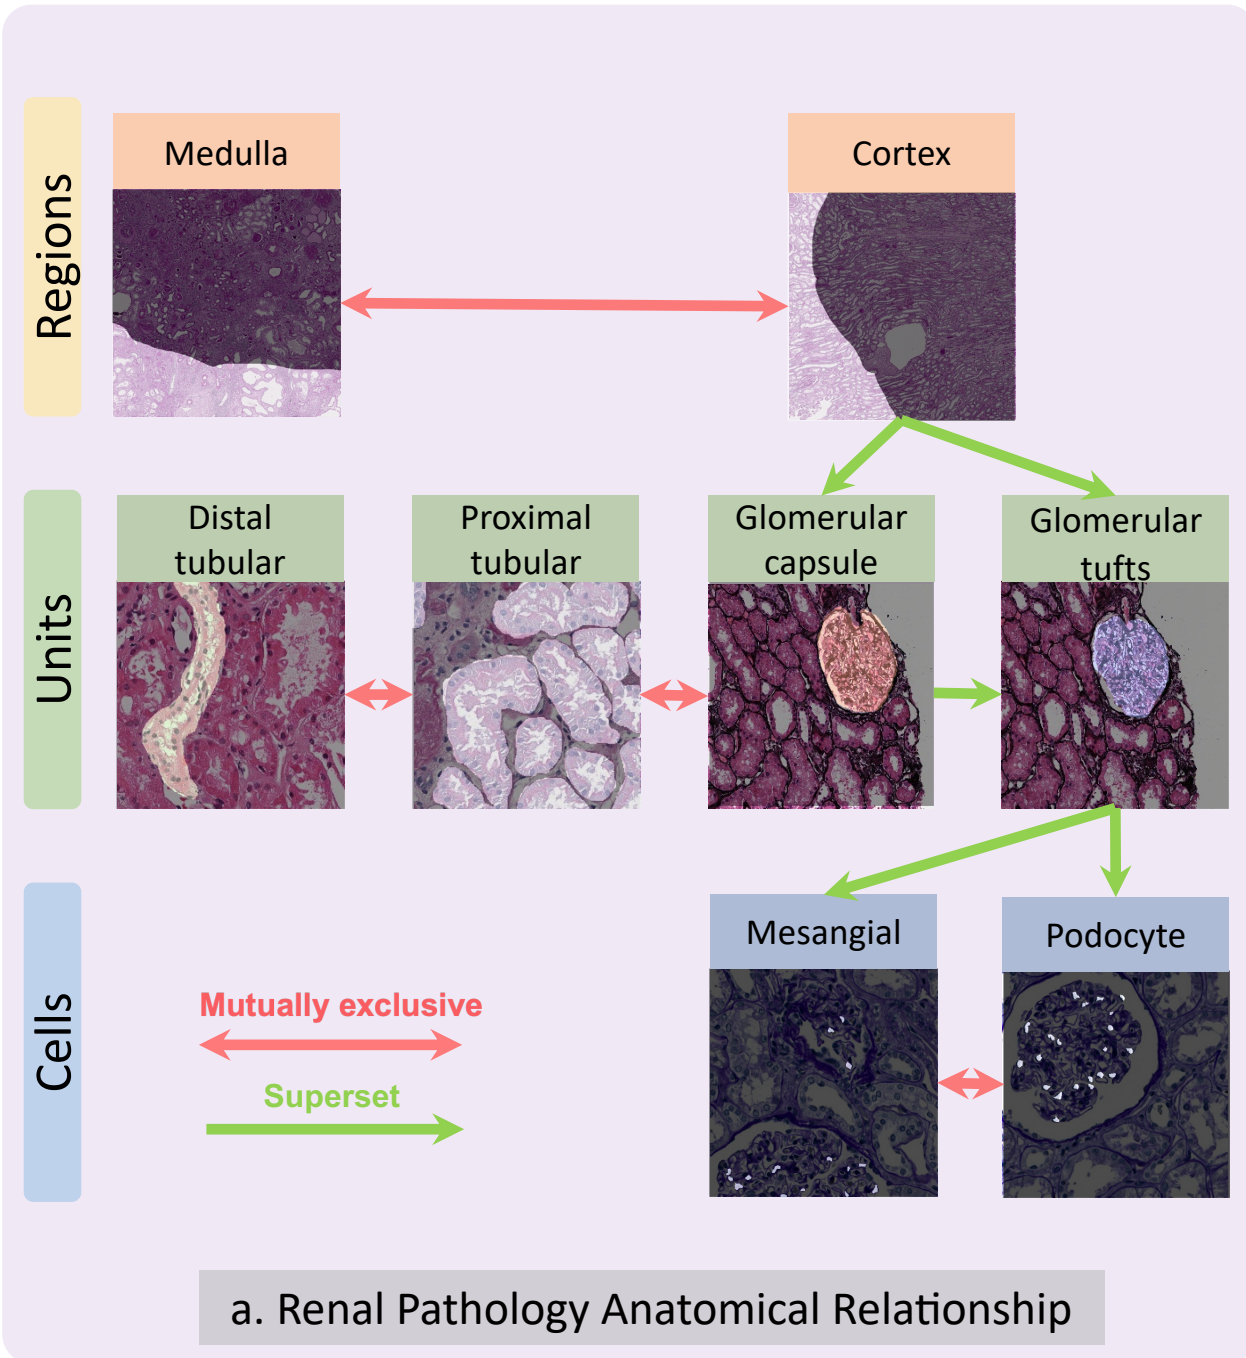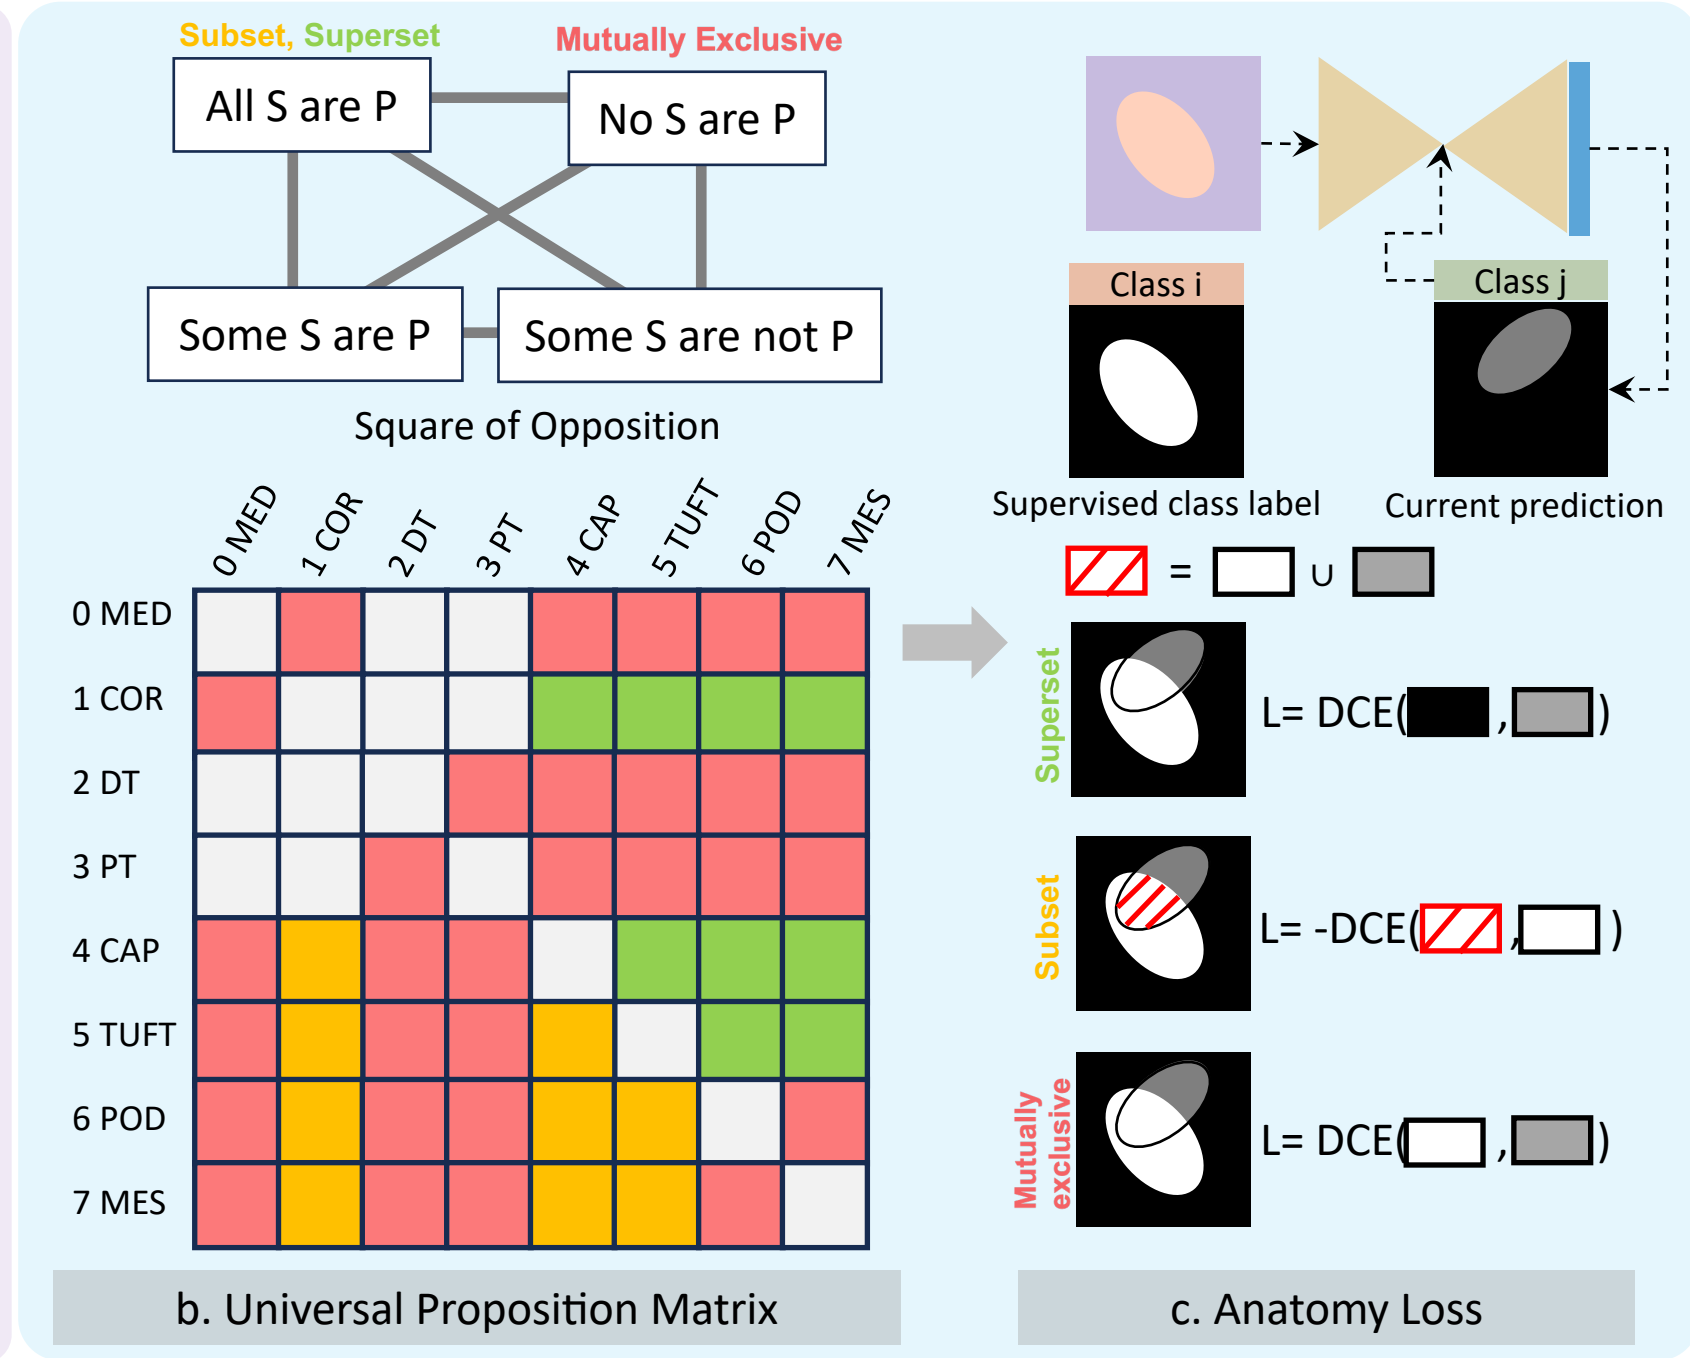

Supplement: Supplementary file 8 [file Deng_PrPSeg_Universal_Proposition_CVPR_2024_supplemental.zip]

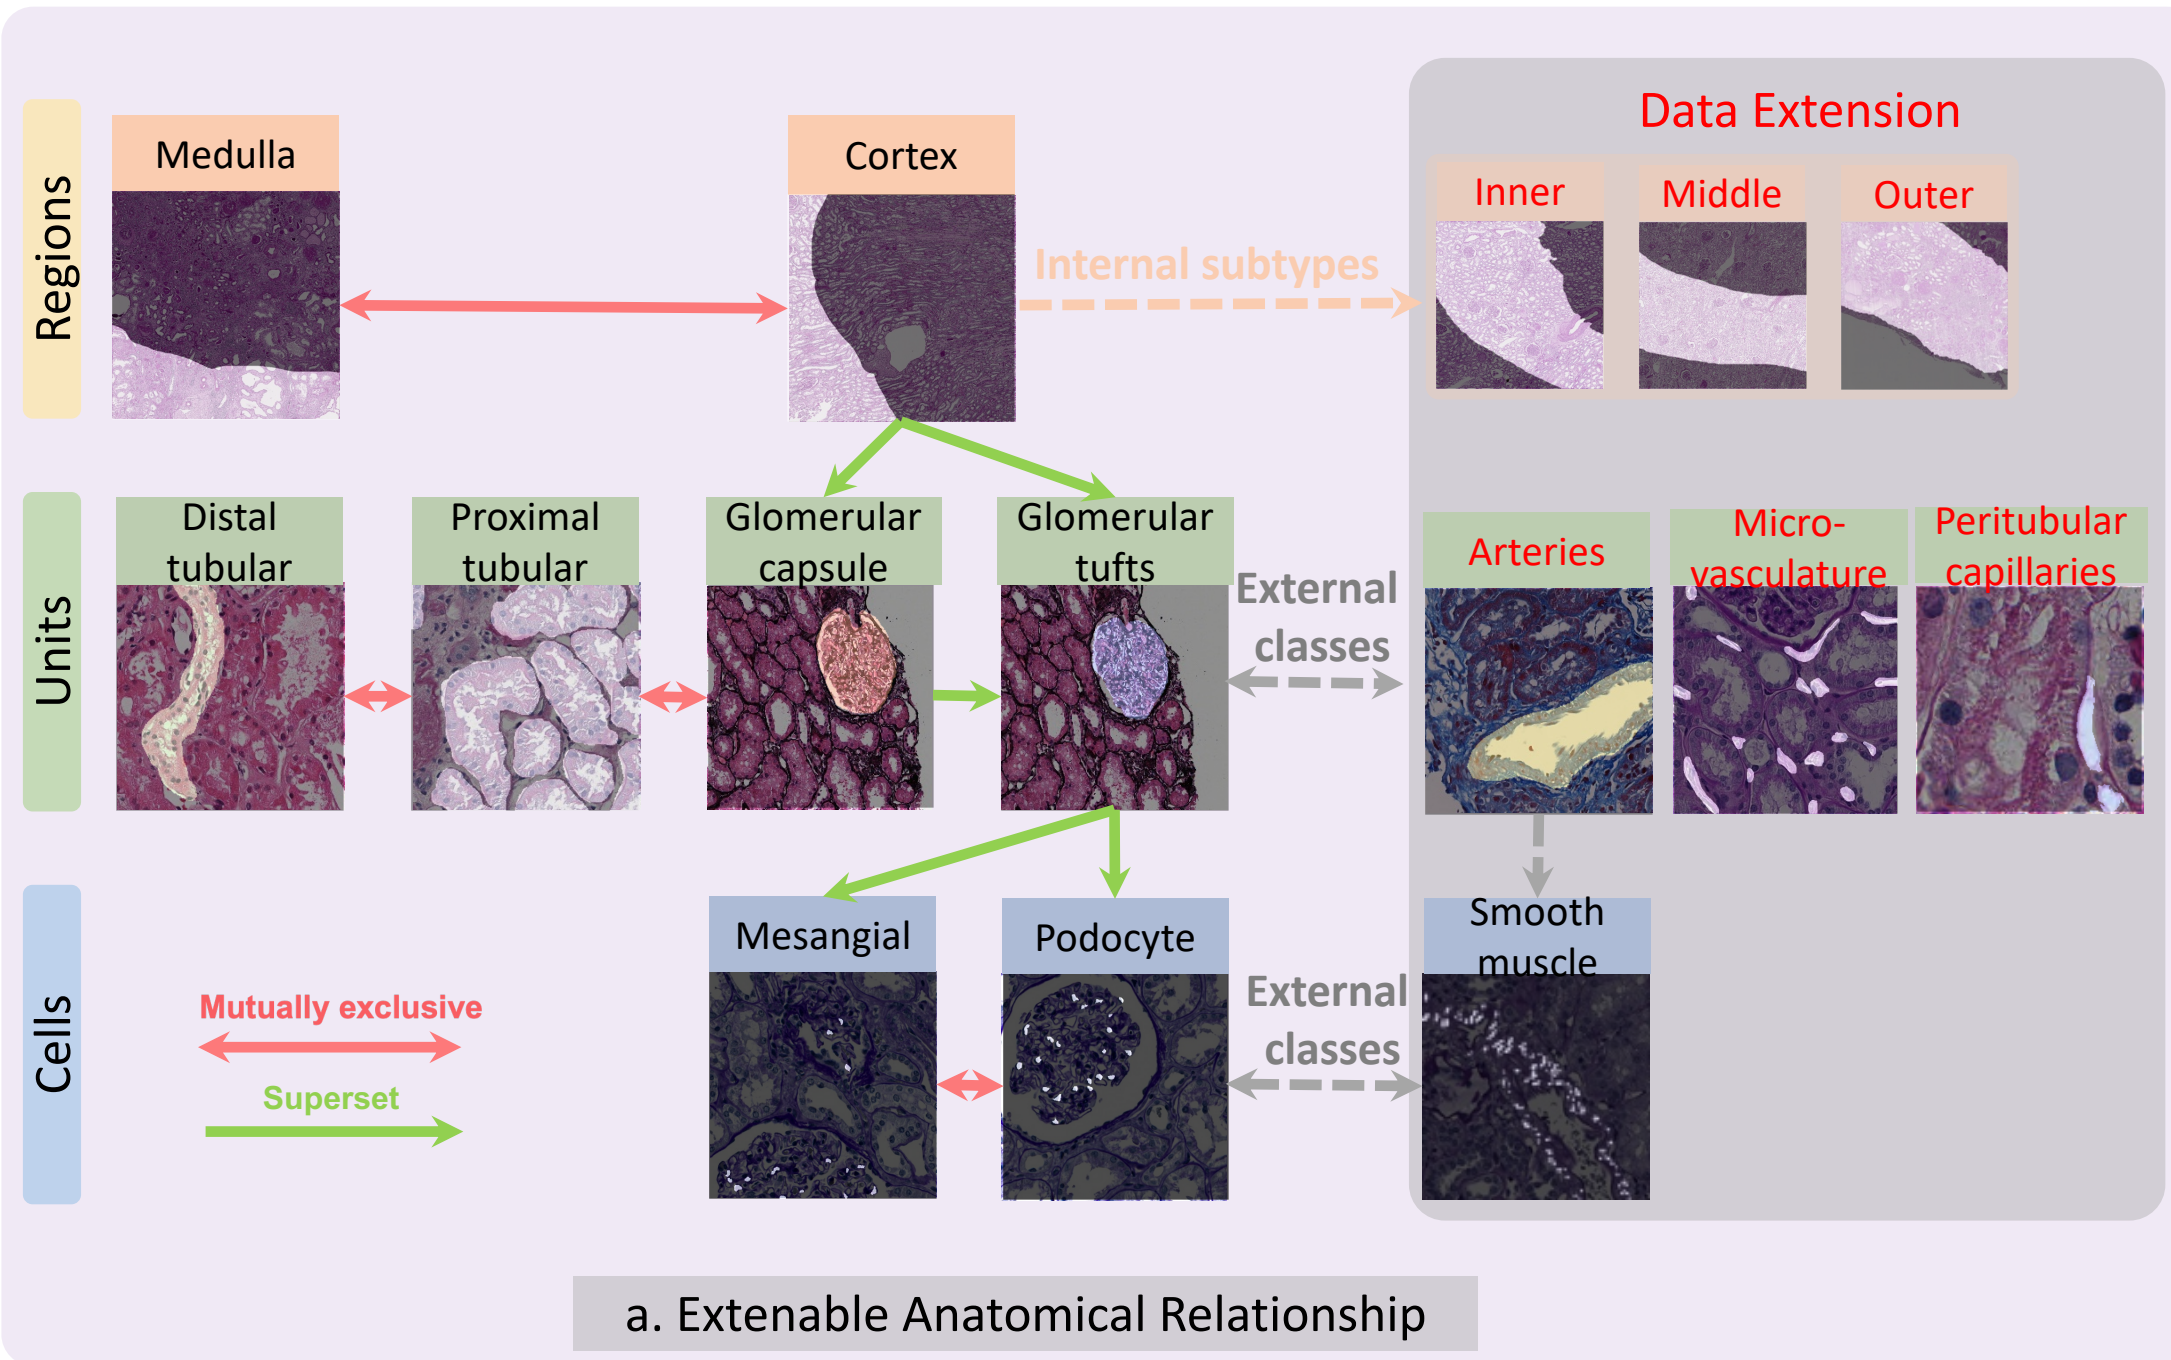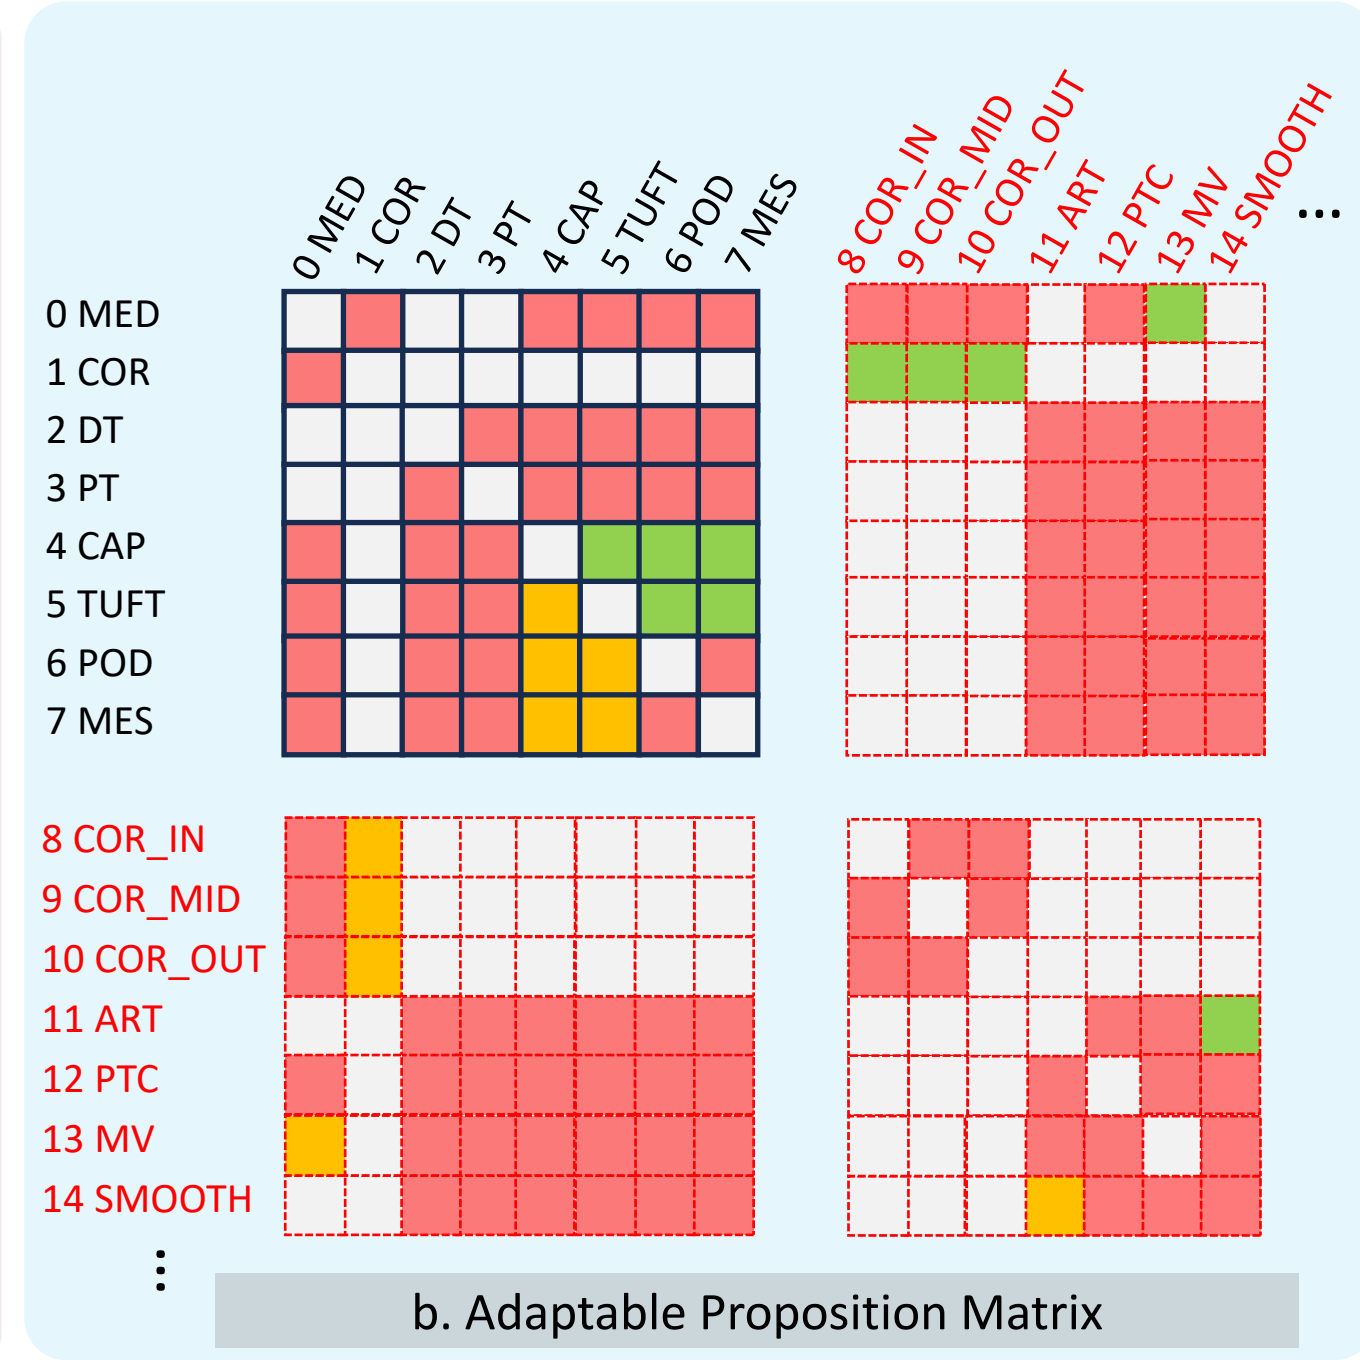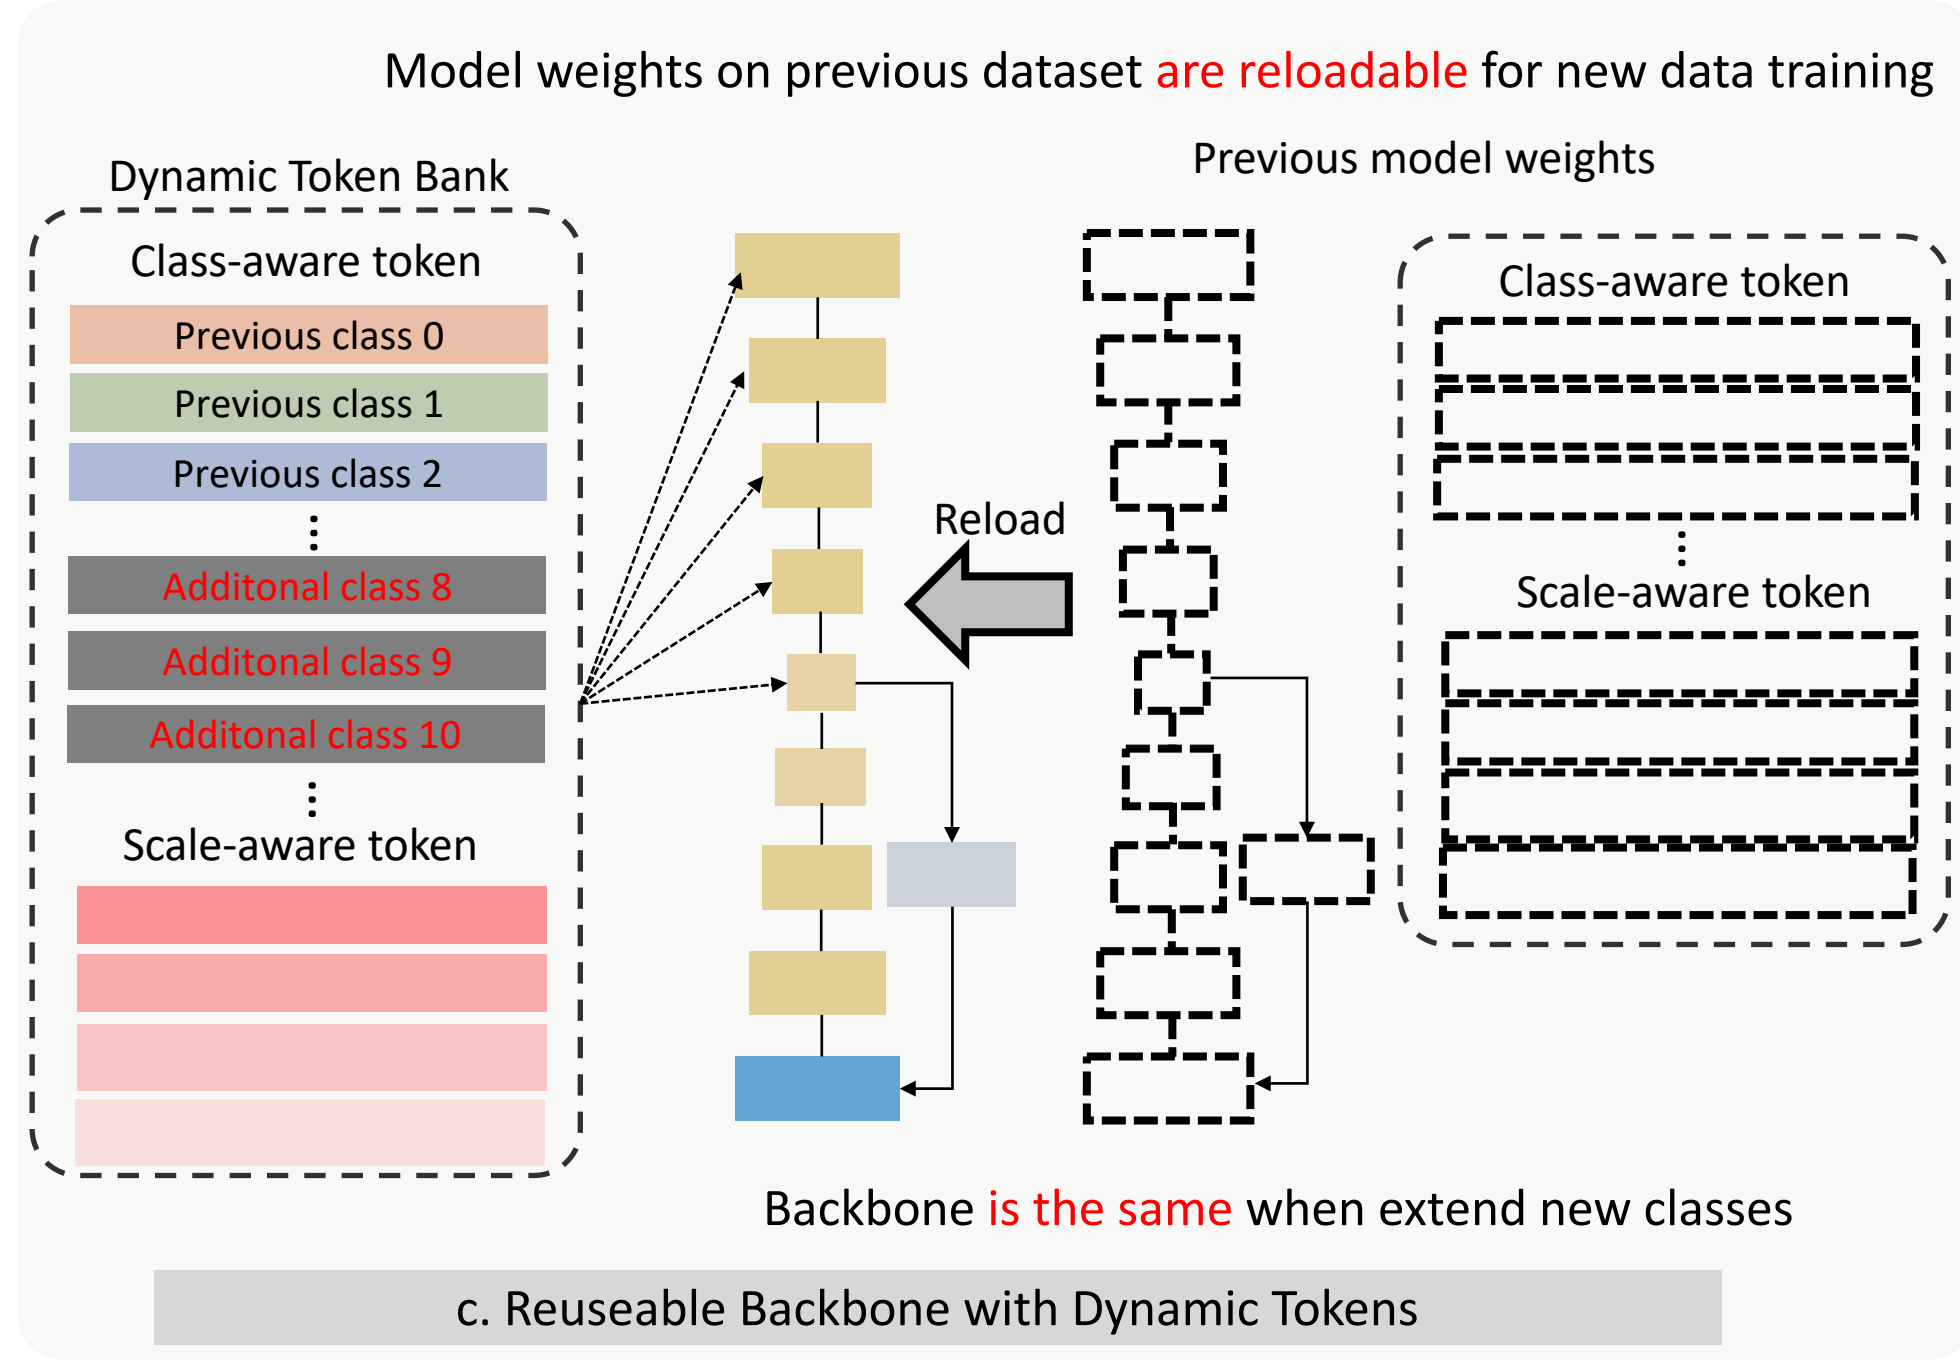

Supplement: Supplementary file 10 [file Deng_PrPSeg_Universal_Proposition_CVPR_2024_supplemental.zip]
